# Supplementary material for: Phosphorylation of androgen receptors at serine 515 is a potential prognostic marker for triple negative breast cancer
Source: PubMed Central journal article supplement (PMC5514900; doi:10.18632/oncotarget.16420), 2017-03-21
Supplement: oncotarget-08-37172-s001.pdf [file oncotarget-08-37172-s001.pdf]

## Phosphorylation of androgen receptors at serine 515 is a potential prognostic marker for triple negative breast cancer

### Supplementary Materials

**Supplementary Table 1: Relationship between ligand-independent AR phosphorylation and cancer-specific survival in patients with ER+ve and ER-ve invasive ductal breast cancer**

|                                  | ER+ve (n = 228) |                 |                        |              | ER-ve (n = 104) |                 |                        |       |
|----------------------------------|-----------------|-----------------|------------------------|--------------|-----------------|-----------------|------------------------|-------|
|                                  | N (%)           | 10yr-CSS % (SE) | Univariate HR (95% CI) | P            | N (%)           | 10yr-CSS % (SE) | Univariate HR (95% CI) | P     |
| <b>Total AR expression</b>       |                 |                 |                        |              |                 |                 |                        |       |
| Low expression                   | 89 (39)         | 87 (4)          | 1.43 (0.72–2.84)       | 0.309        | 78 (75)         | 69 (5)          | 1.41 (0.67–2.98)       | 0.365 |
| High expression                  | 139 (61)        | 82 (4)          |                        |              | 26 (22)         | 62 (10)         |                        |       |
| <b>AR-515 phosphorylation</b>    |                 |                 |                        |              |                 |                 |                        |       |
| Low expression                   | 118 (52)        | 83 (4)          | 0.78 (0.41–1.51)       | 0.459        | 47 (45)         | 66 (7)          | 0.85 (0.43–1.71)       | 0.656 |
| High expression                  | 110 (48)        | 85 (4)          |                        |              | 57 (55)         | 69 (6)          |                        |       |
| <b>ERK1/2 phosphorylation</b>    |                 |                 |                        |              |                 |                 |                        |       |
| Low expression                   | 82 (36)         | 77 (5)          | 0.43 (0.22–0.82)       | <b>0.008</b> | 69 (66)         | 66 (6)          | 0.88 (0.41–1.86)       | 0.728 |
| High expression                  | 146 (64)        | 88 (3)          |                        |              | 35 (34)         | 71 (8)          |                        |       |
| <b>Combined AR + AR-515</b>      |                 |                 |                        |              |                 |                 |                        |       |
| Low AR+AR-515                    | 56 (24)         | 86 (5)          | 1.04 (0.68–1.60)       | 0.985        | 39 (38)         | 66 (8)          | 1.06 (0.65–1.73)       | 0.721 |
| High AR or AR-515                | 95 (42)         | 83 (4)          |                        |              | 47 (45)         | 71 (7)          |                        |       |
| High AR + AR-515                 | 77 (34)         | 84 (5)          |                        |              | 18 (17)         | 61 (11)         |                        |       |
| <b>Combined pERK1/2 + AR-515</b> |                 |                 |                        |              |                 |                 |                        |       |
| Low pERK1/2+AR-515               | 58 (25)         | 80 (6)          | 0.64 (0.42–0.98)       | <b>0.038</b> | 36 (35)         | 72 (8)          | 0.70 (0.58–1.45)       | 0.249 |
| High pERK1/2 or AR-515           | 84 (37)         | 81 (5)          |                        |              | 44 (42)         | 59 (8)          |                        |       |
| High pERK1/2 + AR-515            | 86 (38)         | 90 (4)          |                        |              | 24 (23)         | 79 (8)          |                        |       |

**Supplementary Table 2: Relationship between ligand-independent AR phosphorylation and cancer-specific survival in patients with TNBC (*n* = 94)**

|                                  | HER2-type ( <i>n</i> = 29) |                 |                        |          | TNBC ( <i>n</i> = 65) |                 |                        |              |
|----------------------------------|----------------------------|-----------------|------------------------|----------|-----------------------|-----------------|------------------------|--------------|
|                                  | <i>N</i> (%)               | 10yr-CSS % (SE) | Univariate HR (95% CI) | <i>P</i> | <i>N</i> (%)          | 10yr-CSS % (SE) | Univariate HR (95% CI) | <i>P</i>     |
| <b>Total AR expression</b>       |                            |                 |                        |          |                       |                 |                        |              |
| Low expression                   | 20 (69)                    | 46 (12)         | 0.39 (0.09–1.79)       | 0.207    | 52 (80)               | 75 (6)          | 3.31 (1.35–8.11)       | <b>0.006</b> |
| High expression                  | 9 (31)                     | 78 (14)         |                        |          | 13 (20)               | 38 (13)         |                        |              |
| <b>AR-515 phosphorylation</b>    |                            |                 |                        |          |                       |                 |                        |              |
| Low expression                   | 17 (59)                    | 44 (12)         | 0.30 (0.08–1.12)       | 0.056    | 26 (40)               | 76 (9)          | 1.70 (0.65–4.42)       | 0.274        |
| High expression                  | 12 (41)                    | 74 (13)         |                        |          | 39 (60)               | 62 (8)          |                        |              |
| <b>ERK1/2 phosphorylation</b>    |                            |                 |                        |          |                       |                 |                        |              |
| Low expression                   | 21 (72)                    | 51 (12)         | 0.52 (0.11–2.40)       | 0.390    | 43 (66)               | 70 (7)          | 1.33 (0.54–3.25)       | 0.534        |
| High expression                  | 8 (28)                     | 75 (15)         |                        |          | 22 (34)               | 63 (11)         |                        |              |
| <b>Combined AR + AR-515</b>      |                            |                 |                        |          |                       |                 |                        |              |
| Low AR+AR-515                    | 13 (45)                    | 42 (14)         | 0.40 (0.16–1.01)       | 0.114    | 23 (36)               | 77 (9)          | 2.19 (1.14–4.20)       | <b>0.007</b> |
| High AR or AR-515                | 11 (38)                    | 53 (15)         |                        |          | 32 (49)               | 73 (8)          |                        |              |
| High AR + AR-515                 | 5 (17)                     | 100 (0)         |                        |          | 10 (15)               | 30 (14)         |                        |              |
| <b>Combined pERK1/2 + AR-515</b> |                            |                 |                        |          |                       |                 |                        |              |
| Low pERK1/2+AR-515               | 10 (36)                    | 33 (16)         | 0.29 (0.09–0.90)       | 0.076    | 21 (32)               | 85 (8)          | 1.35 (0.77–2.34)       | 0.065        |
| High pERK1/2 or AR-515           | 16 (57)                    | 68 (12)         |                        |          | 27 (42)               | 51 (10)         |                        |              |
| High pERK1/2 + AR-515            | 2 (7)                      | 100 (0)         |                        |          | 17 (26)               | 70 (11)         |                        |              |
